# Supplementary material
Source: Springer Nature journal article supplement (https://www.springermedizin.de/resource/supplementary/12885_2010_2764_MOESM7_ESM.pdf/9461816)

**A**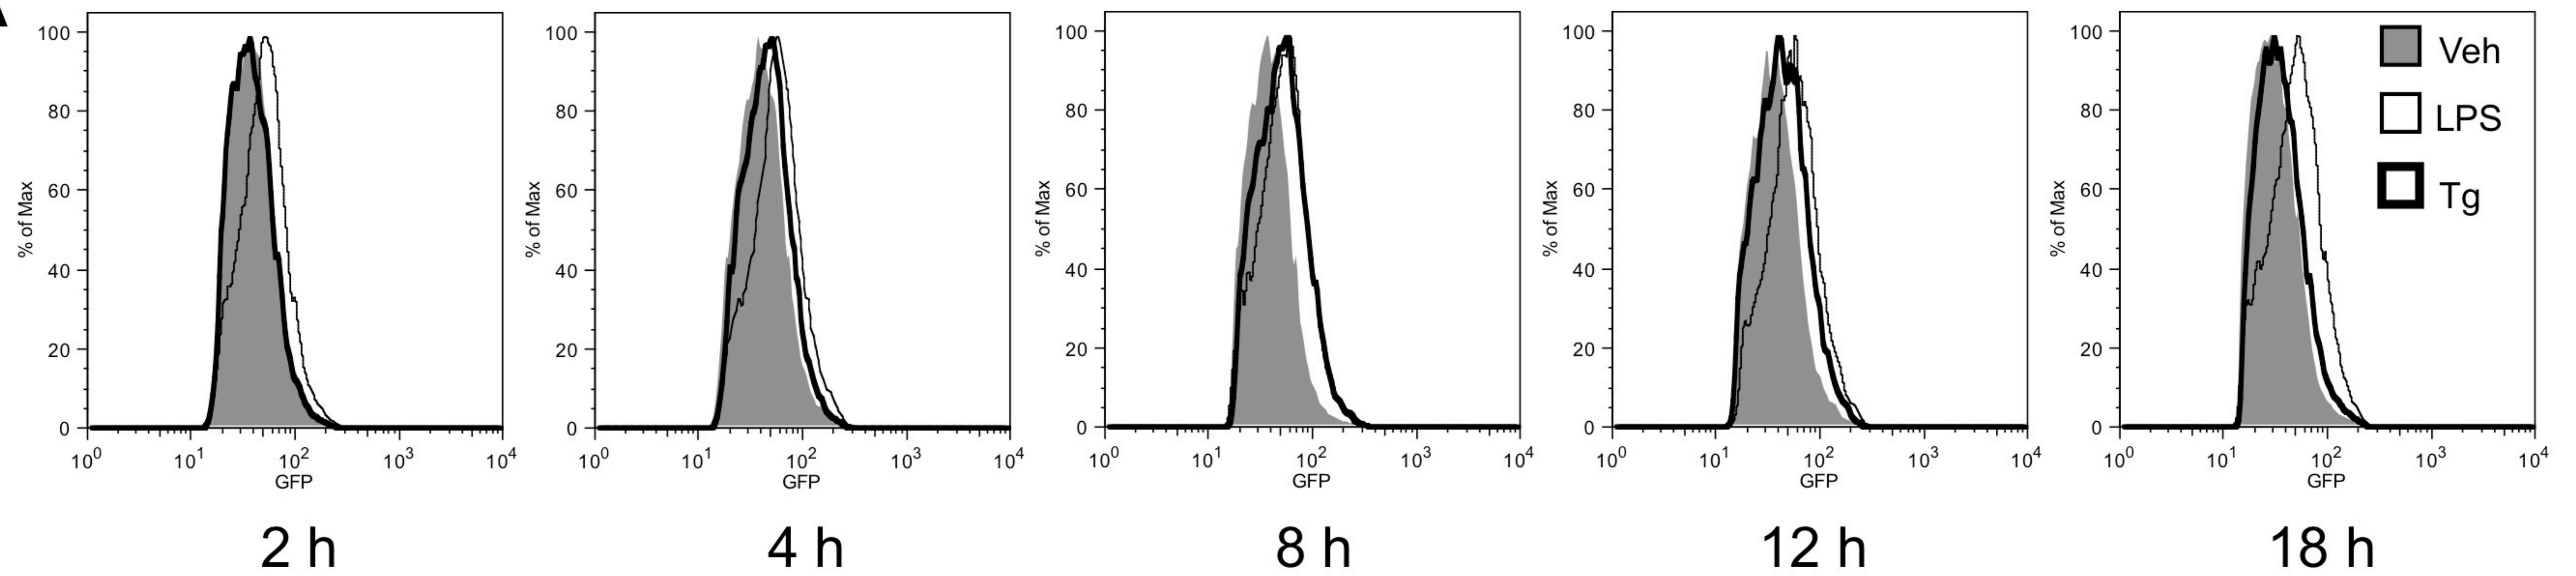**B**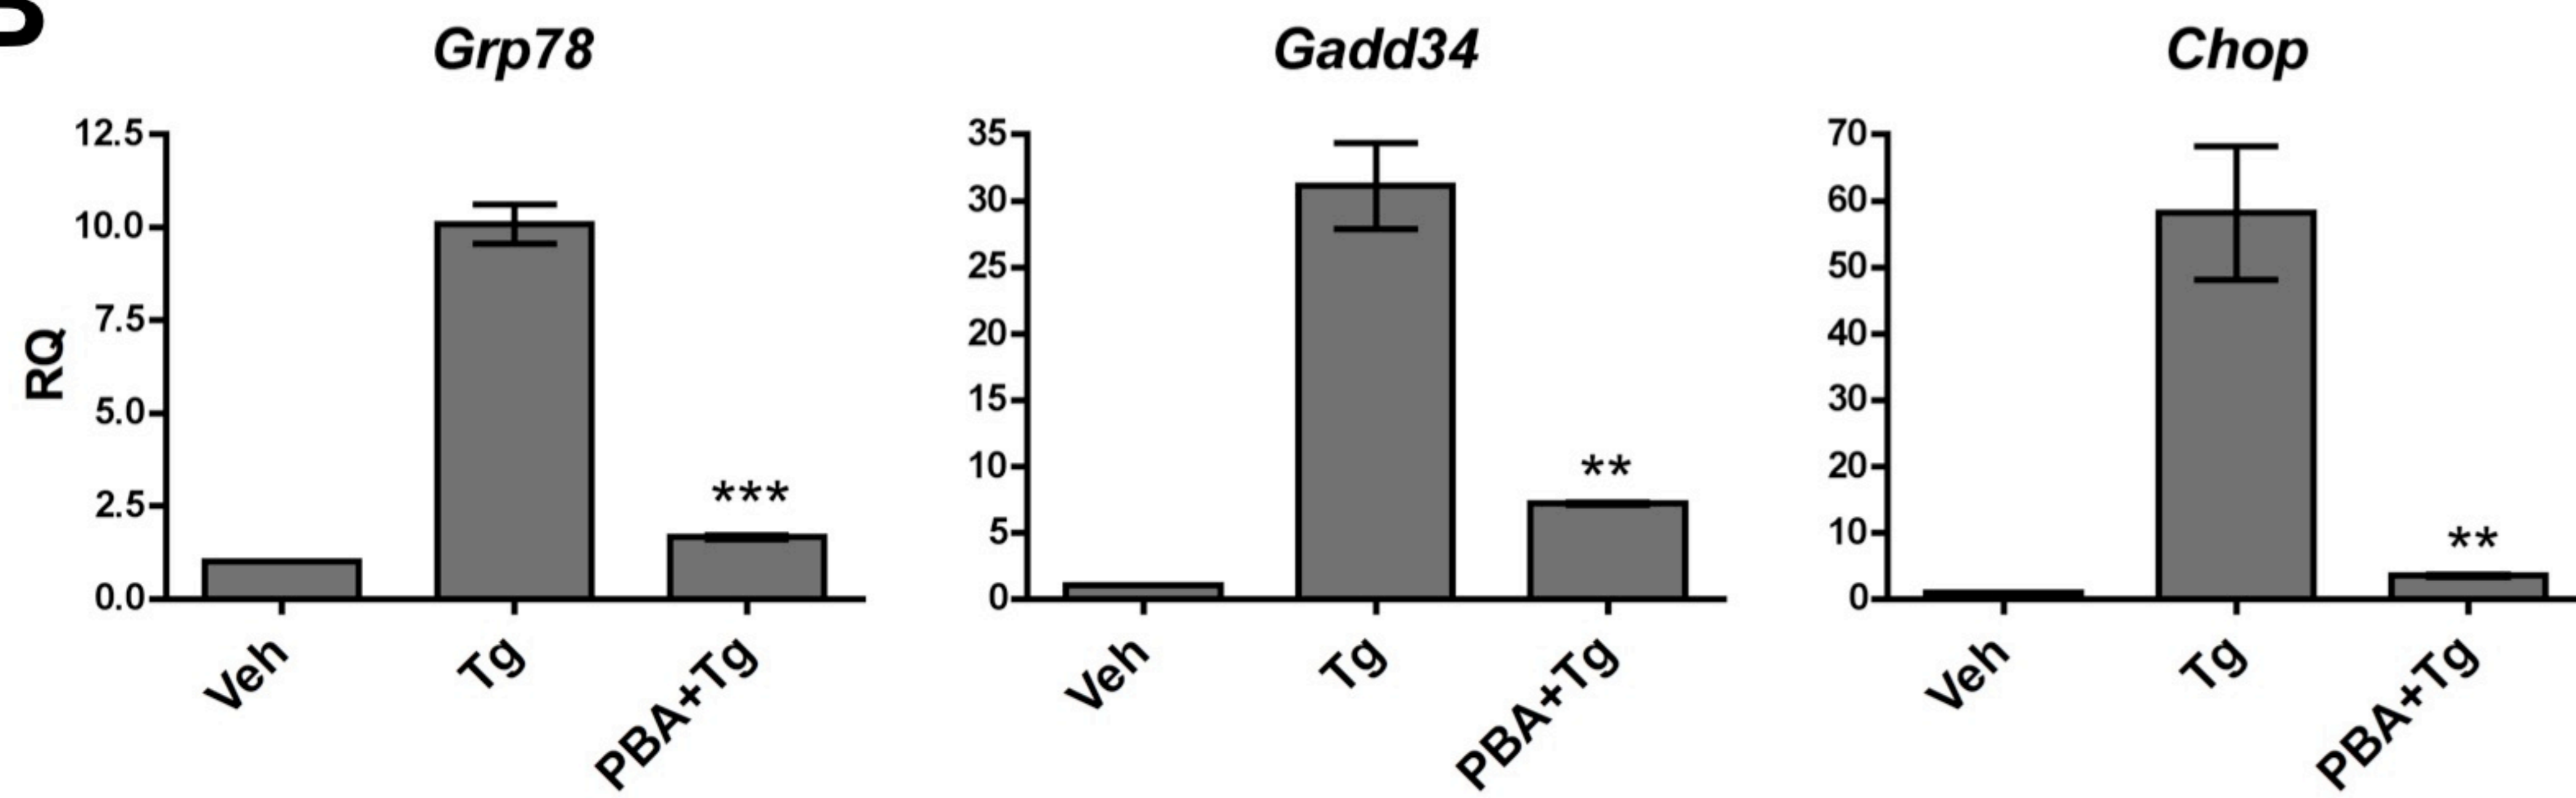**C**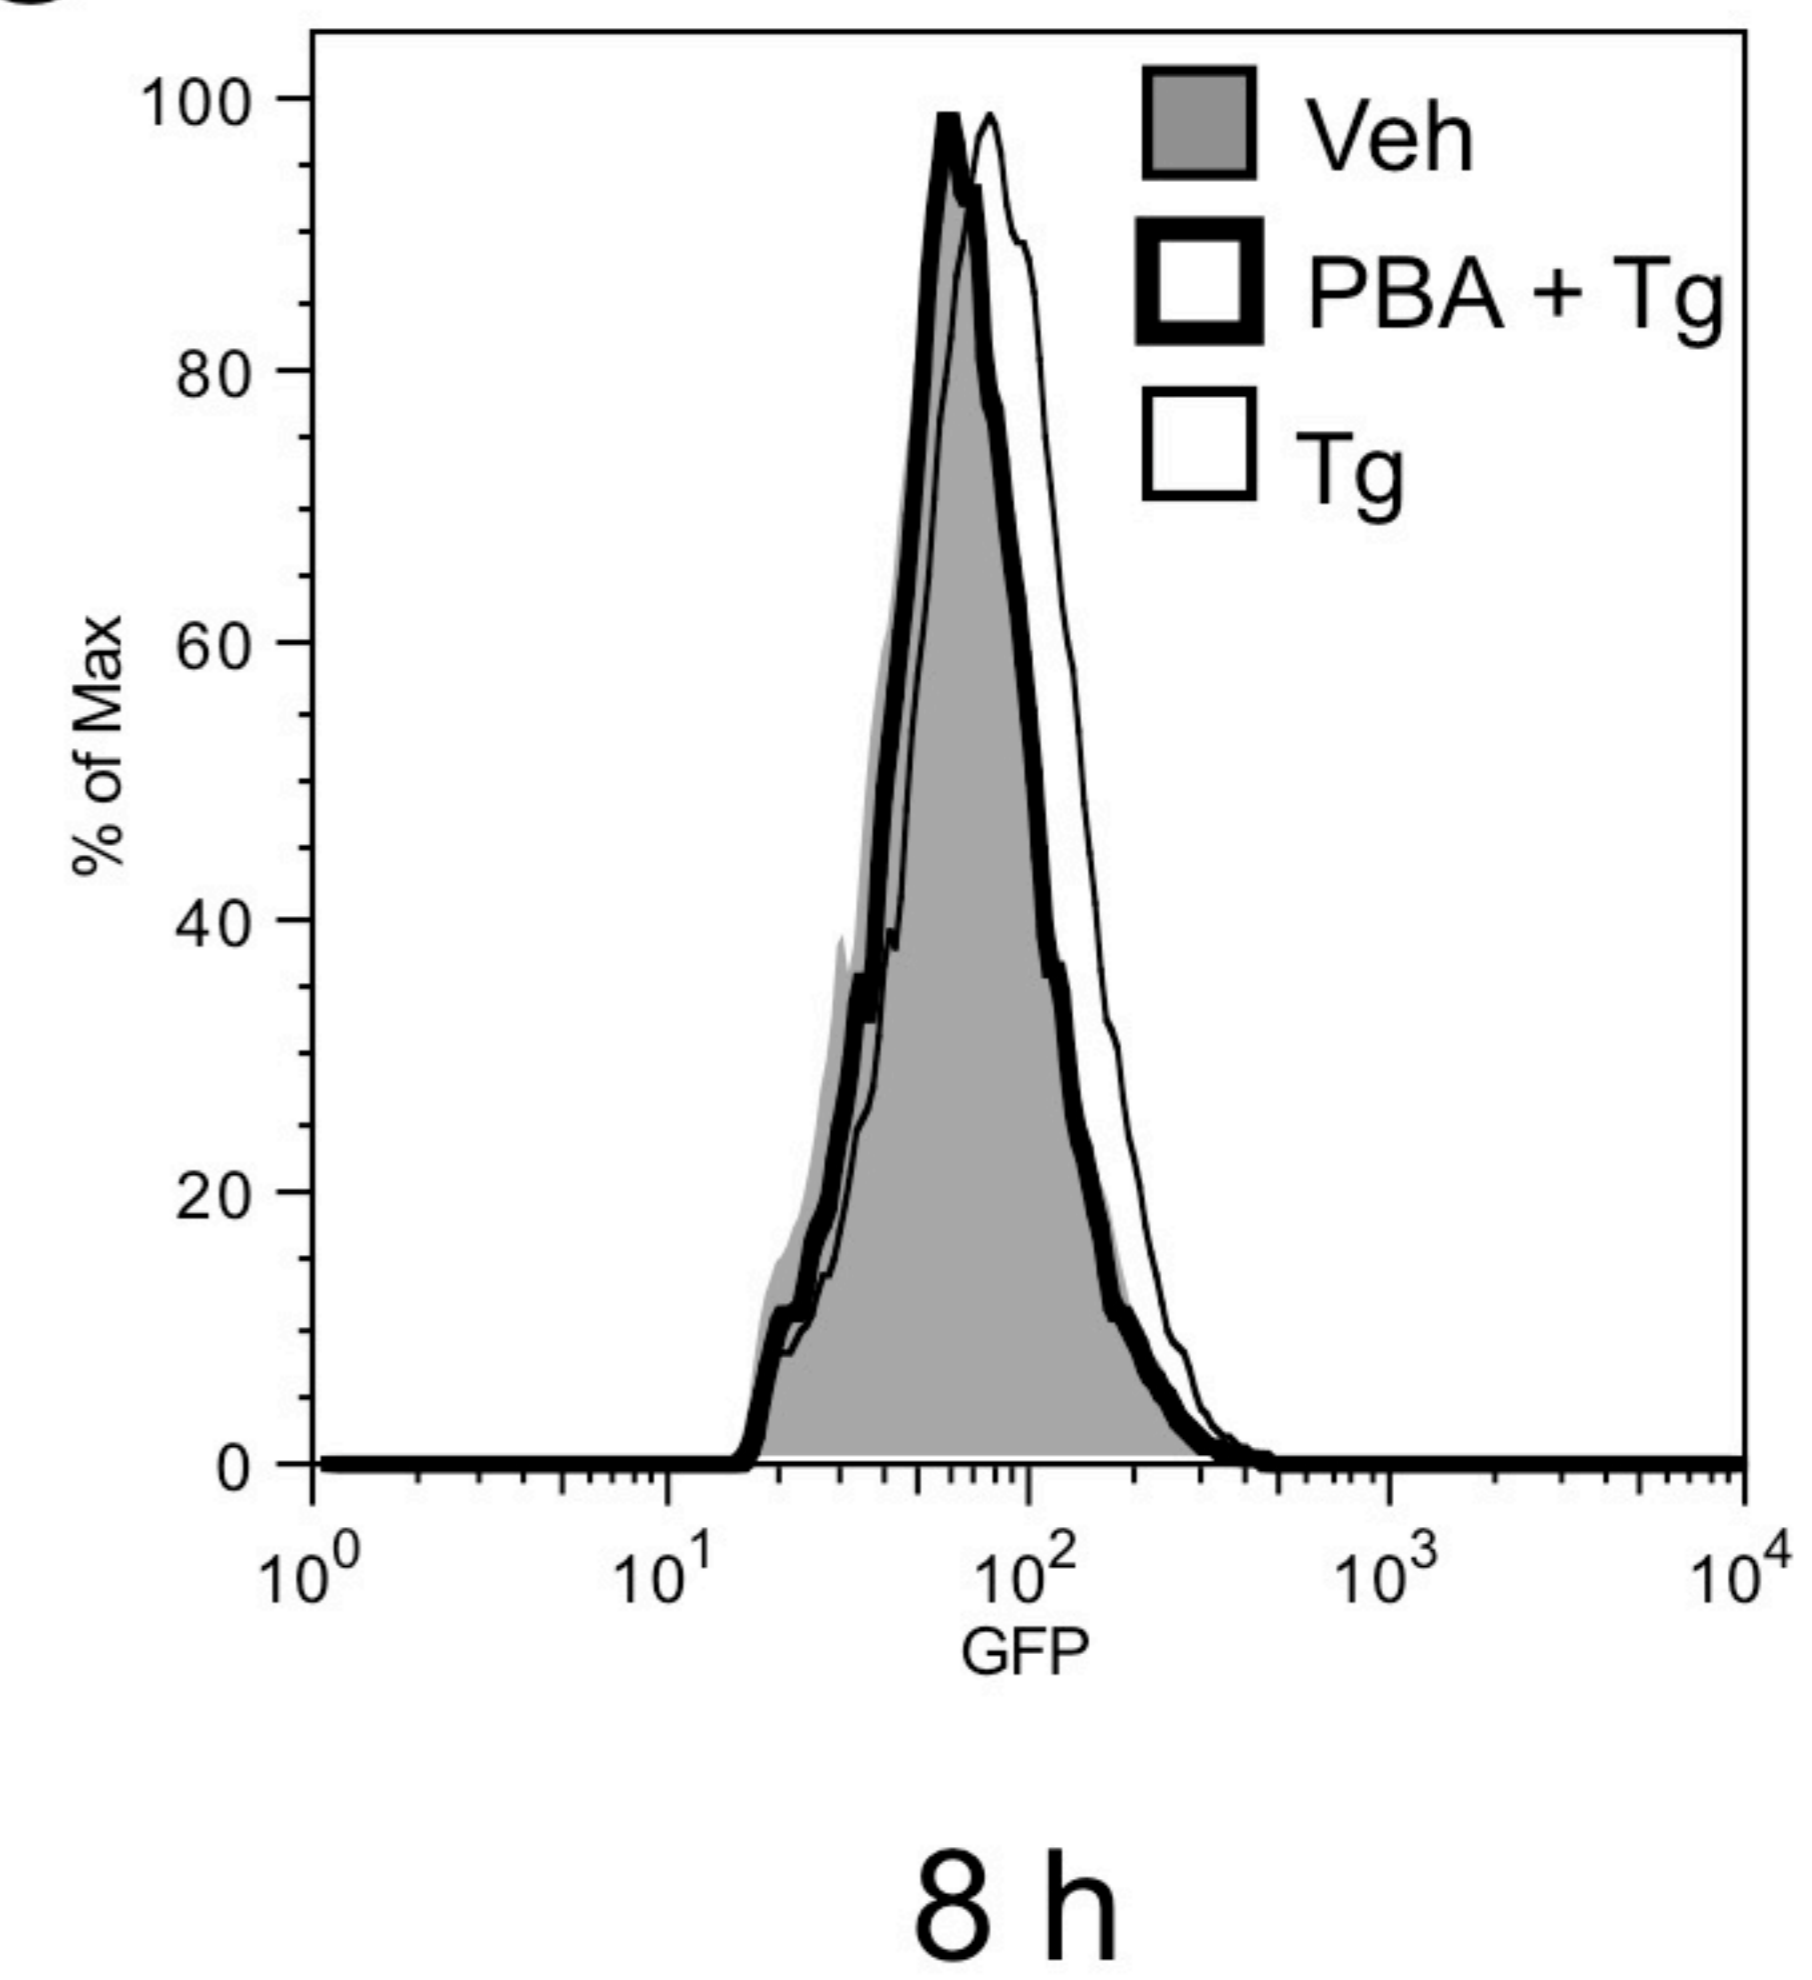**E**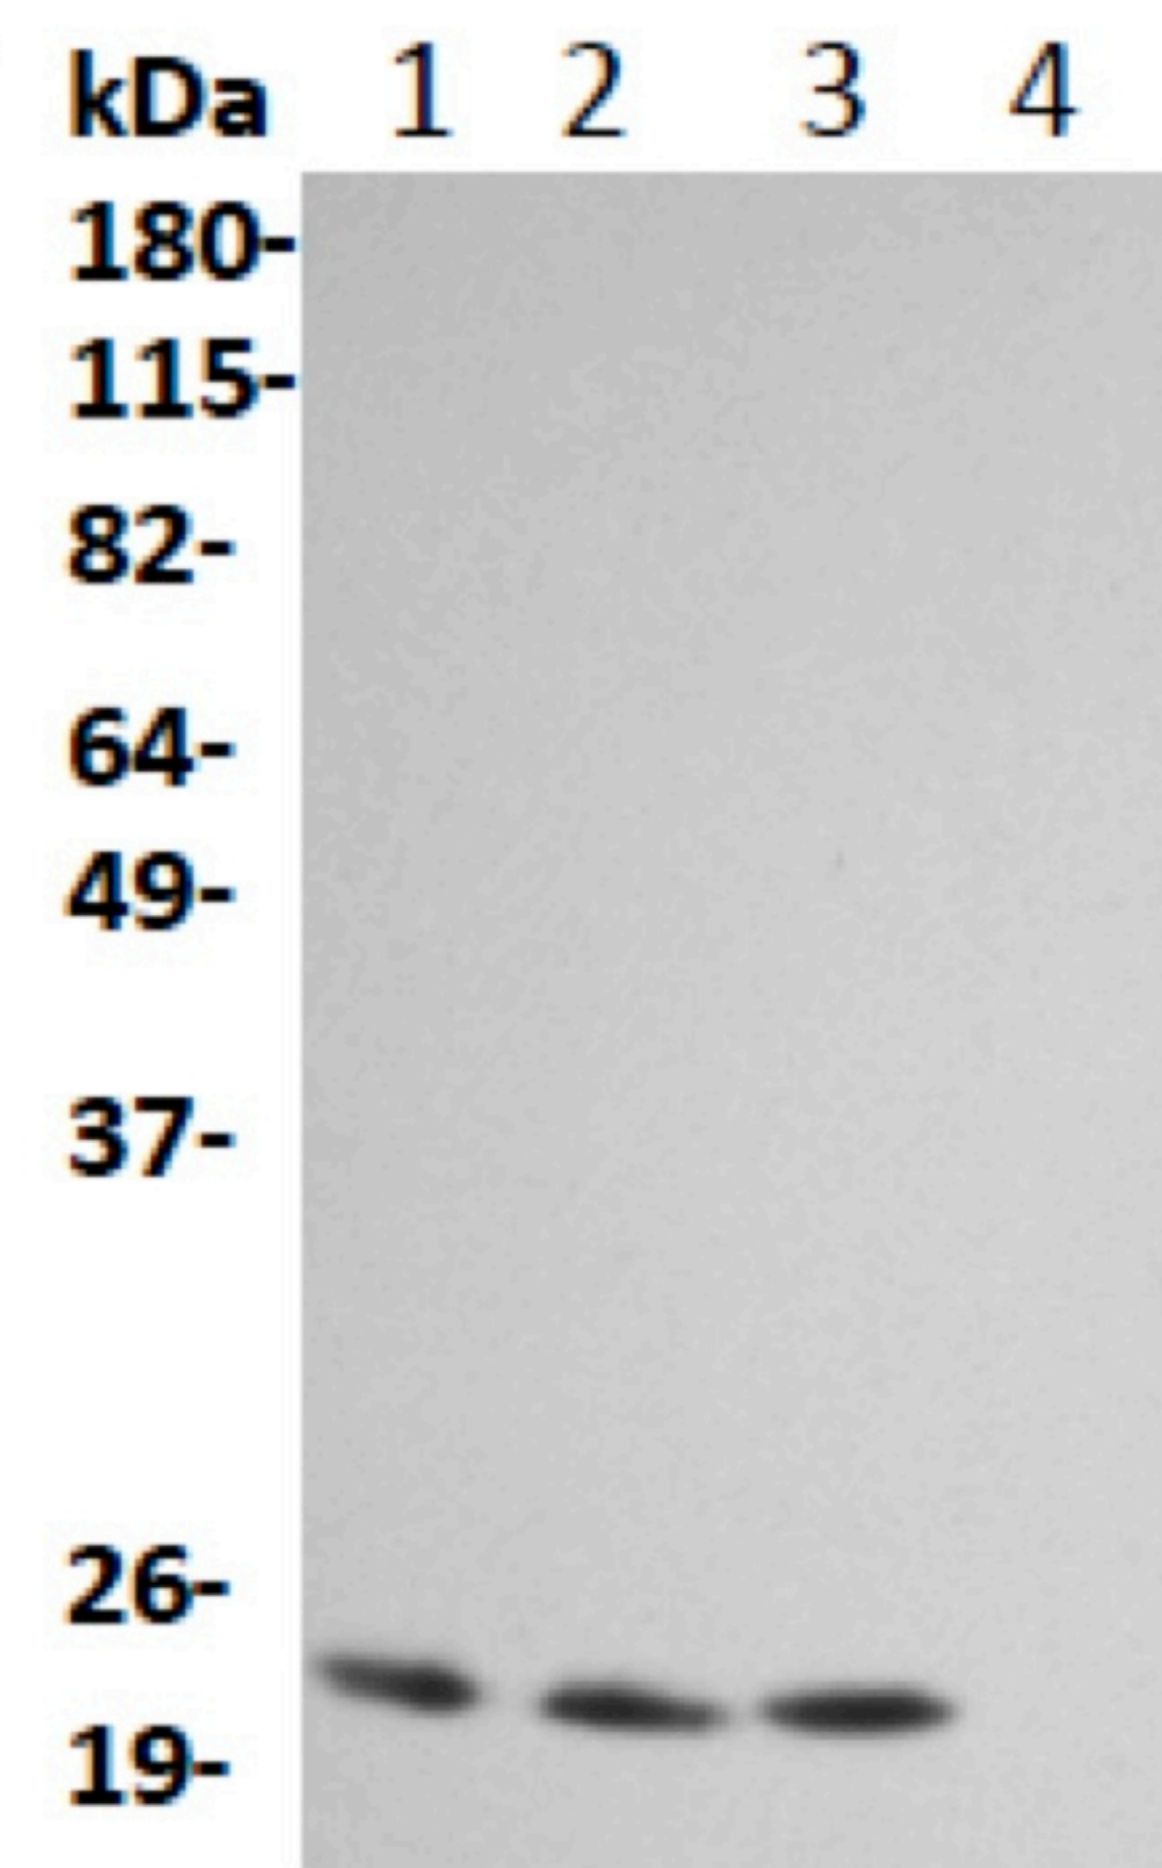**D**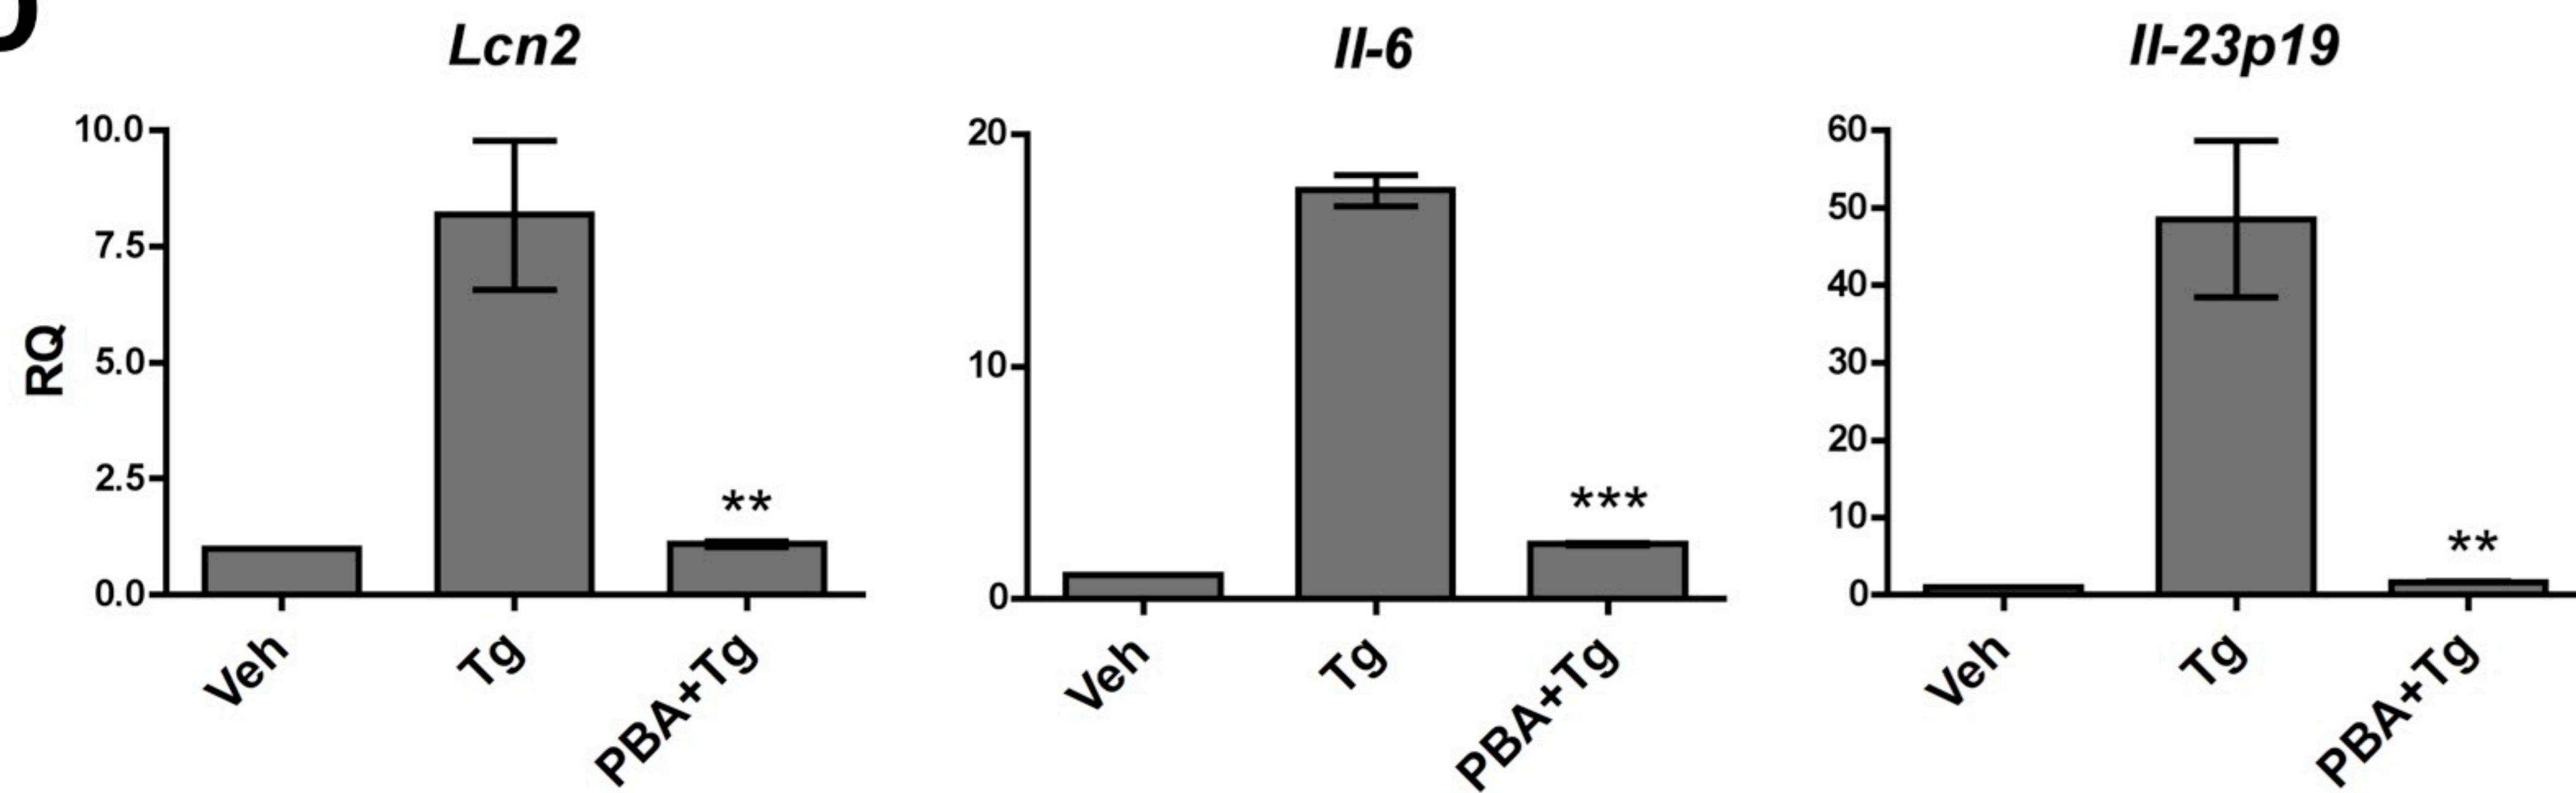

Supplement: MOESM7 [file 9461816]
